# Supplementary material for: A peptidoglycan recognition protein acts in whitefly (Bemisia tabaci) immunity and involves in Begomovirus acquisition
Source: PubMed Central journal article supplement (PMC5124967; doi:10.1038/srep37806), 2016-11-28
Supplement: srep37806-s1.pdf [file srep37806-s1.pdf]

1 **Supplementary Information**

2 **A peptidoglycan recognition protein acts in whitefly**  
3 **(*Bemisia tabaci*) immunity and involves in Begomovirus**  
4 **acquisition**

5

6 **Zhi-Zhi Wang<sup>a</sup>, Min Shi<sup>a</sup>, Yi-Cun Huang<sup>a</sup>, Xiao-Wei Wang<sup>a</sup>, David Stanley<sup>b</sup> and**  
7 **Xue-Xin Chen<sup>a\*</sup>**

8

9 *<sup>a</sup> Ministry of Agriculture Key Lab of Agricultural Entomology, Institute of Insect*

10 *Sciences, Zhejiang University, 866 Yuhangtang Road, Hangzhou 310058, China*

11 *<sup>b</sup> Biological Control of Insects Research Laboratory, Agricultural Research Service, U.S.*

12 *Department of Agriculture, 1503 S. Providence Road, Columbia MO 65203, USA*

13

14 **\*Corresponding author: [xxchen@zju.edu.cn](mailto:xxchen@zju.edu.cn), phone number: +86 571 88982868**

15

16 **Table S1.** Primer sequences used in this paper

| Primer name          | Primer sequences (5'-3')                    | Use                 |
|----------------------|---------------------------------------------|---------------------|
| <i>PGRP-F 1</i>      | CACCACTCCCGACTTCCACCTTGC                    | 3'RACE              |
| <i>PGRP-F 2</i>      | CTCGTGGGCTACTCGGAGCAGGAC                    | 3'RACE              |
| <i>PGRP-R 1</i>      | AAGGTGGAAGTCGGGAGTGGTGGAT                   | 5'RACE              |
| <i>PGRP-R 2</i>      | CGCCGAGAAATGCTATGTTGATGC                    | 5'RACE              |
| <i>PGRP-BamH</i>     | CGGGATCCATTGAGGGTCGCCGAGATTCGTGGTACG        | Vector construction |
| <i>PGRP-Hind III</i> | CCCAAGCTTCTATTCGACGAGGAGGGCGAG              | Vector construction |
| <i>V61</i>           | ATACTTGGACACCTAAT GG                        | IC-PCR              |
| <i>C473</i>          | AGTCACGGGCCCTTAC AA                         | IC-PCR              |
| <i>actin-F</i>       | TGGAGATGGTGTTCACAC                          | qRT-PCR             |
| <i>actin-R</i>       | CCAGCCAAGTCCAAACGAAG                        | qRT-PCR             |
| <i>qPGRP-R</i>       | TTTCGTGGATTCTTTGC                           | qRT-PCR             |
| <i>qPGRP-F</i>       | CAAGGTGGAAGTCGGGAG                          | qRT-PCR             |
| <i>dsPGRP-F</i>      | GAGGCGATGGATCTGTTTAT                        | RNAi                |
| <i>dsPGRP-R</i>      | GGTGGCTGAACAGGGAGGAC                        | RNAi                |
| <i>PGRP-T7-F</i>     | ggatecTAATACGACTCACTATAGGGAGGCGATGGATCTGTT  | RNAi                |
| <i>PGRP-T7-R</i>     | ggatecTAATACGACTCACTATAGGGGTGGCTGAACAGGGAGG | RNAi                |
| <i>dsGFP-F</i>       | AAGGGCGAGGAGCTGTTACCG                       | RNAi                |
| <i>dsGFP-R</i>       | CAGCAGGACCATGTGATCGCGC                      | RNAi                |
| <i>GFP-T7-F</i>      | ggatecTAATACGACTCACTATAGGAAGGGCGAGGAGCTGTT  | RNAi                |
| <i>GFP-T7-R</i>      | ggatecTAATACGACTCACTATAGGCAGCAGGACCATGTGATC | RNAi                |

18 **Table S2.** Dialysis buffers used in succession to refold rBtPGRP.

| Buffer No. | Buffer recipe                                                                                                                                                   |
|------------|-----------------------------------------------------------------------------------------------------------------------------------------------------------------|
| 1          | 25mM Tris buffer (pH 8.0) containing 0.2M NaCl, 5mM DTT, 1mM EDTA and 6M urea                                                                                   |
| 2          | 25mM Tris buffer containing 50mM NaCl, 1mM EDTA, 4M urea, 0.1mM l-arginine (Arg), 0.2mM oxidized glutathione (GSSG) and 2mM reduced glutathione (GSH) at pH 8.0 |
| 3          | 25mM Tris buffer containing 20mM NaCl, 1mM EDTA, 2M urea, 0.1mM Arg, 0.2mM GSSG and 2mM GSH at pH8.0                                                            |
| 4          | 25mM Tris buffer containing 10mM NaCl, 1mM EDTA, 1M urea, 0.1mM Arg, 1mM DTT, 0.2mM GSSG and 2mM GSH at pH 7.4                                                  |
| 5          | 25mM Tris buffer containing 10mM NaCl, 1mM EDTA, 0.5M urea, 0.1mM Arg, 1mM DTT, 1% Gly, 0.2mM GSSG and 2mM GSH at pH 7.4                                        |

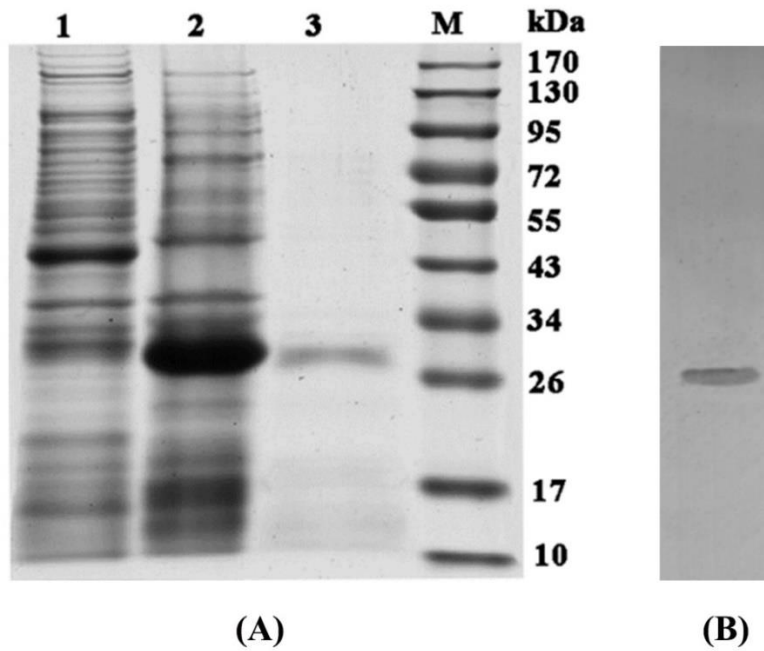

20

21 **Figure S1.** Expression of the BtPGRP gene in *E. coli* and purification of the BtPGRP  
 22 peptide. (A) Expression of the BtPGRP gene in *E. coli* B121 (DE3) and enrichment of the  
 23 rBtPGRP protein, analyzed on 12% SDS-PAGE gels. Lane M: protein molecular weight  
 24 markers; Lane 1: the total proteins in uninduced *E. coli* B121; Lane 2: the expressed  
 25 product of pET 28a-BtPGRP induced with 1 mM IPTG; Lane 3: Highly enriched  
 26 recombinant protein. (B) Western blot analysis of purified rBtPGRP.

27

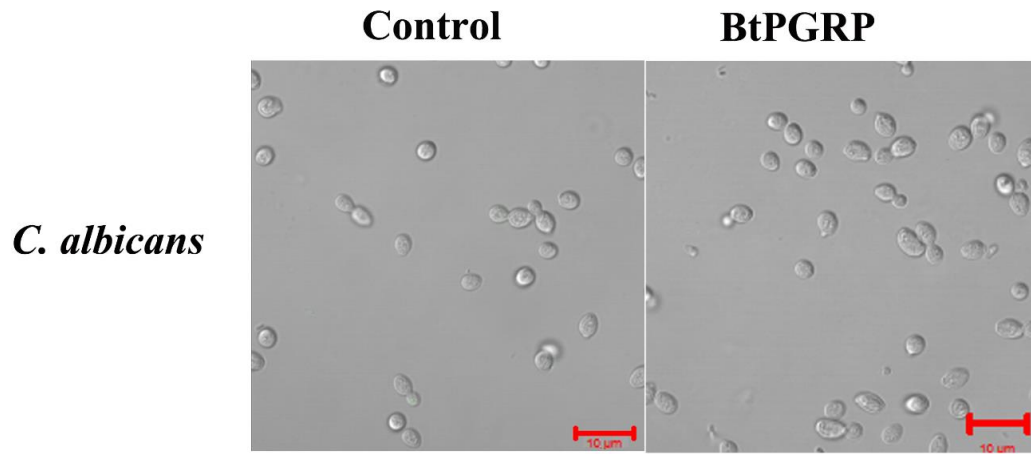

29

30 **Figure S2.** Immunofluorescence staining shows the binding of rBtPGRP to *C. albicans*.31 *C. albicans* was treated with rBtPGRP for 10 min. rBtPGRP (green) is not seen bound to32 the fungal cell walls of *C. albicans*.

33

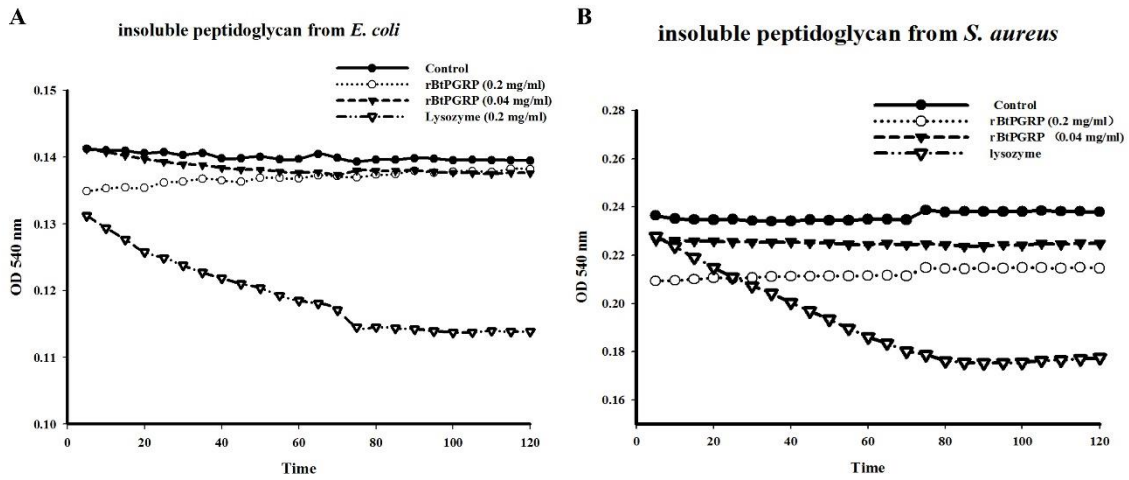

35

36 **Figure S3.** Enzymatic degradation of peptidoglycan. rBtPGRP or egg white lysozyme  
 37 was incubated with insoluble peptidoglycan from *E. coli* and *S. aureus* (InvivoGen,  
 38 USA), and the optical density (OD) at 540nm was recorded every fifth minute during a  
 39 120 min period.

40

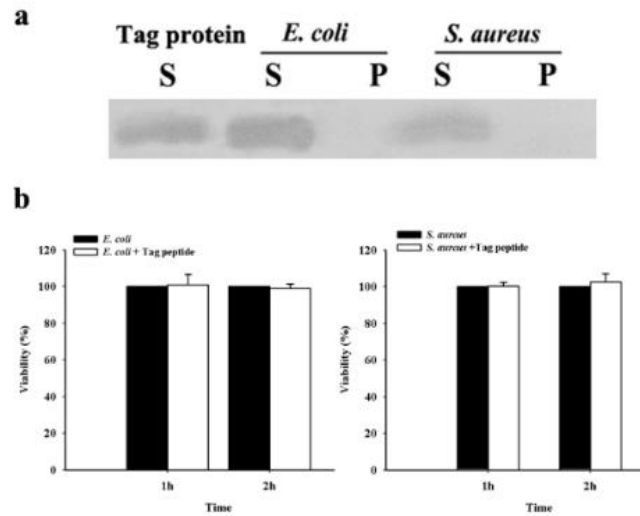

42

43 **Figure S4.** Microbial binding and bactericidal activity of His -Thrombin tag peptide. (a)  
 44 Western blot analysis of the microbial binding activity of tag protein. Live *S. aureus* and  
 45 *E. coli* were incubated with tag protein for 10 min. Bound tag protein (P) was separated  
 46 from free tag protein (S) in the supernatant by centrifugation. Tag protein without added  
 47 microorganisms was used as a control (left lane). The samples were analyzed by western  
 48 blotting using an anti-His antibody. (c) Bactericidal activity of tag protein against *E. coli*  
 49 (left) and *S. aureus* (right). Diluted bacteria samples were incubated with tag protein for 1  
 50 h or 2 h and then spread on LB agar plates. Viability was recorded as CFUs/ml after  
 51 incubation for 18 h (n = 3).

52

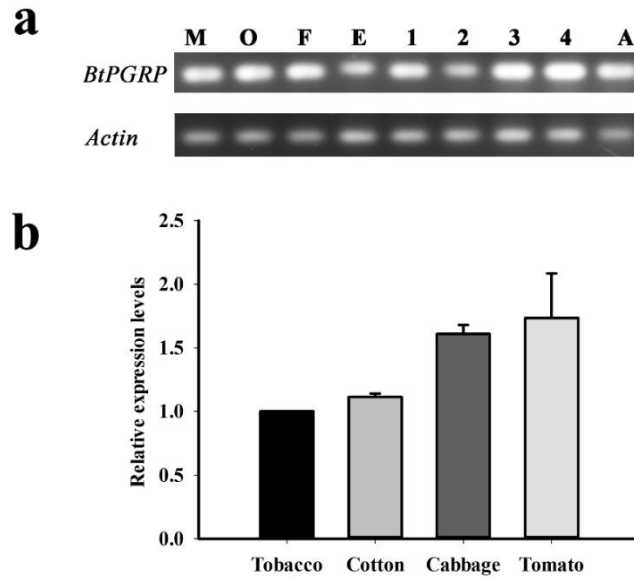

54

55 **Figure S5.** Analysis of *BtPGRP* mRNA expression. (a) *BtPGRP* mRNA expression in the  
 56 the indicated whitefly tissues and life stages. M, midgut; O, ovary; F, fat body; E, egg; 1-  
 57 4, 1<sup>st</sup> to 4<sup>th</sup> instar larvae; A, adults. (b) *BtPGRP* mRNA expression in the *B. tabaci* in  
 58 response to host plants. Whiteflies feeding on different host plants (cotton, cabbage and  
 59 tobacco) at least for three generations were used for RNA isolation. The data represent  
 60 the mean  $\pm$  SD of 3 biological samples.
